# Supplementary material
Source: PubMed Central journal article supplement (PMC3911028)
Supplement: AEM.03075-13_zam999104994so1.pdf [file AEM.03075-13_zam999104994so1.pdf]

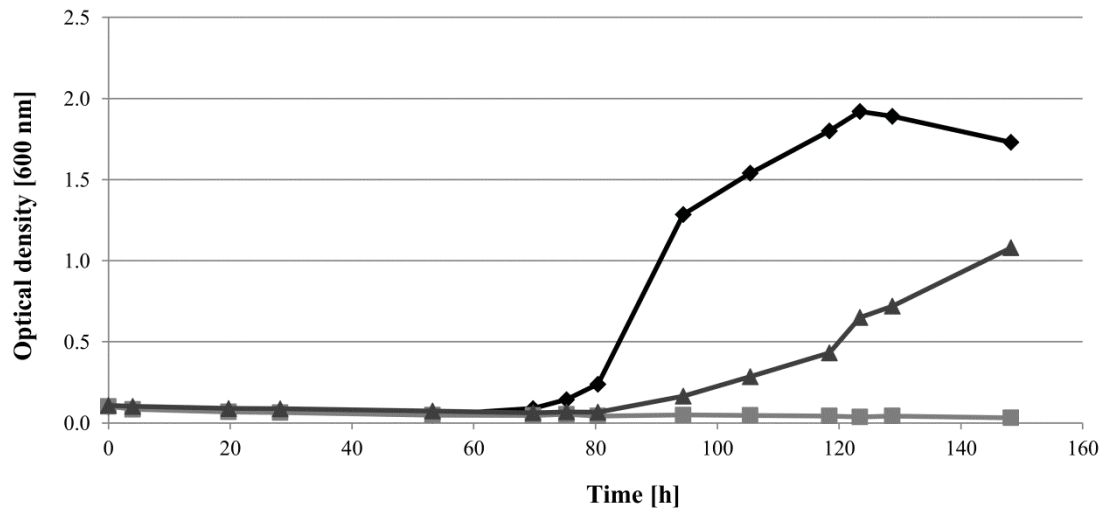

**FIG S1** Growth of *A. mimigardefordensis* DPN7<sup>T</sup> (wild type) (◆), *A. mimigardefordensis* DPN7<sup>T</sup>  $\Delta$ sucCD (■) and *A. mimigardefordensis* DPN7<sup>T</sup>  $\Delta$ sucCD (pBBR1MCS5::sucCD<sub>Am</sub>) (▲) in minimal medium containing 50 mM DTDP as sole carbon and energy source.
